# Supplementary material for: Limitations of learning in the proboscis reflex of the flower visiting syrphid fly Eristalis tenax
Source: PubMed Central journal article supplement (PMC5860702; doi:10.1371/journal.pone.0194167), 2018-03-20

# Dual choice of trained flies (proboscis reflex)

Training (3X)

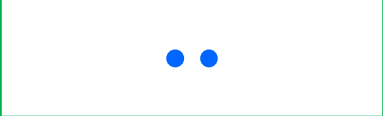

1cm

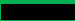

Training (3X) (control)

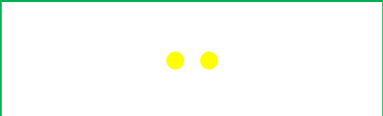

Test 1

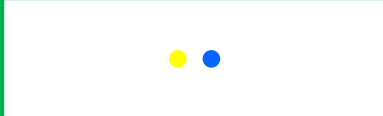

Test 2

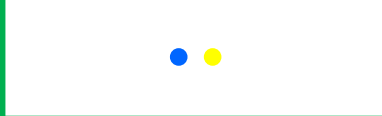

Test 1

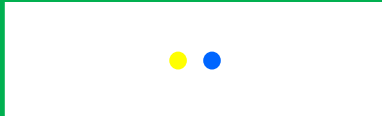

Test 2

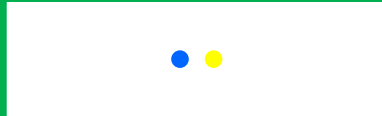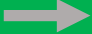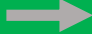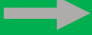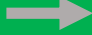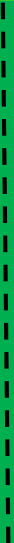

# Dual choice of trained flies (direction of walking)

Training (3X)

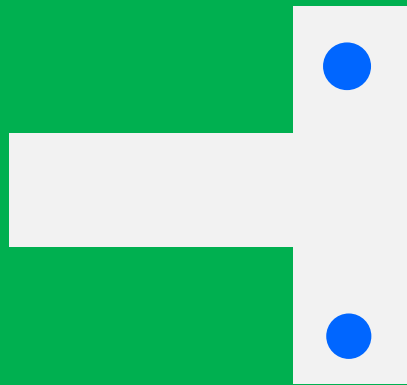

1cm

Test

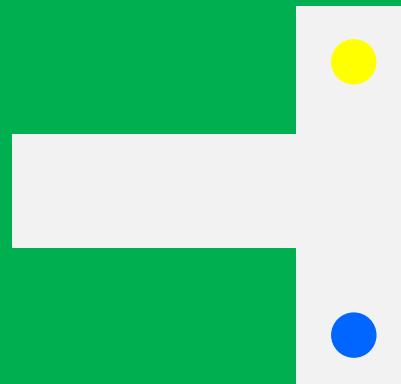

Training (3X) (control)

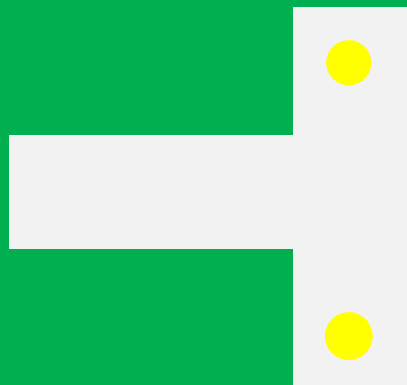

Test

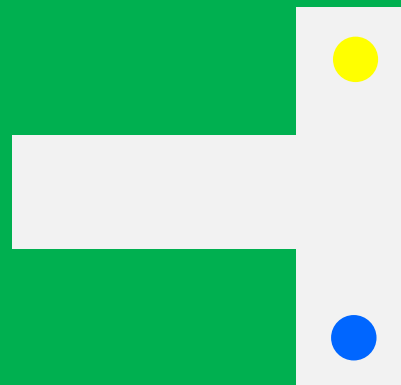

# Absolute and differential conditioning

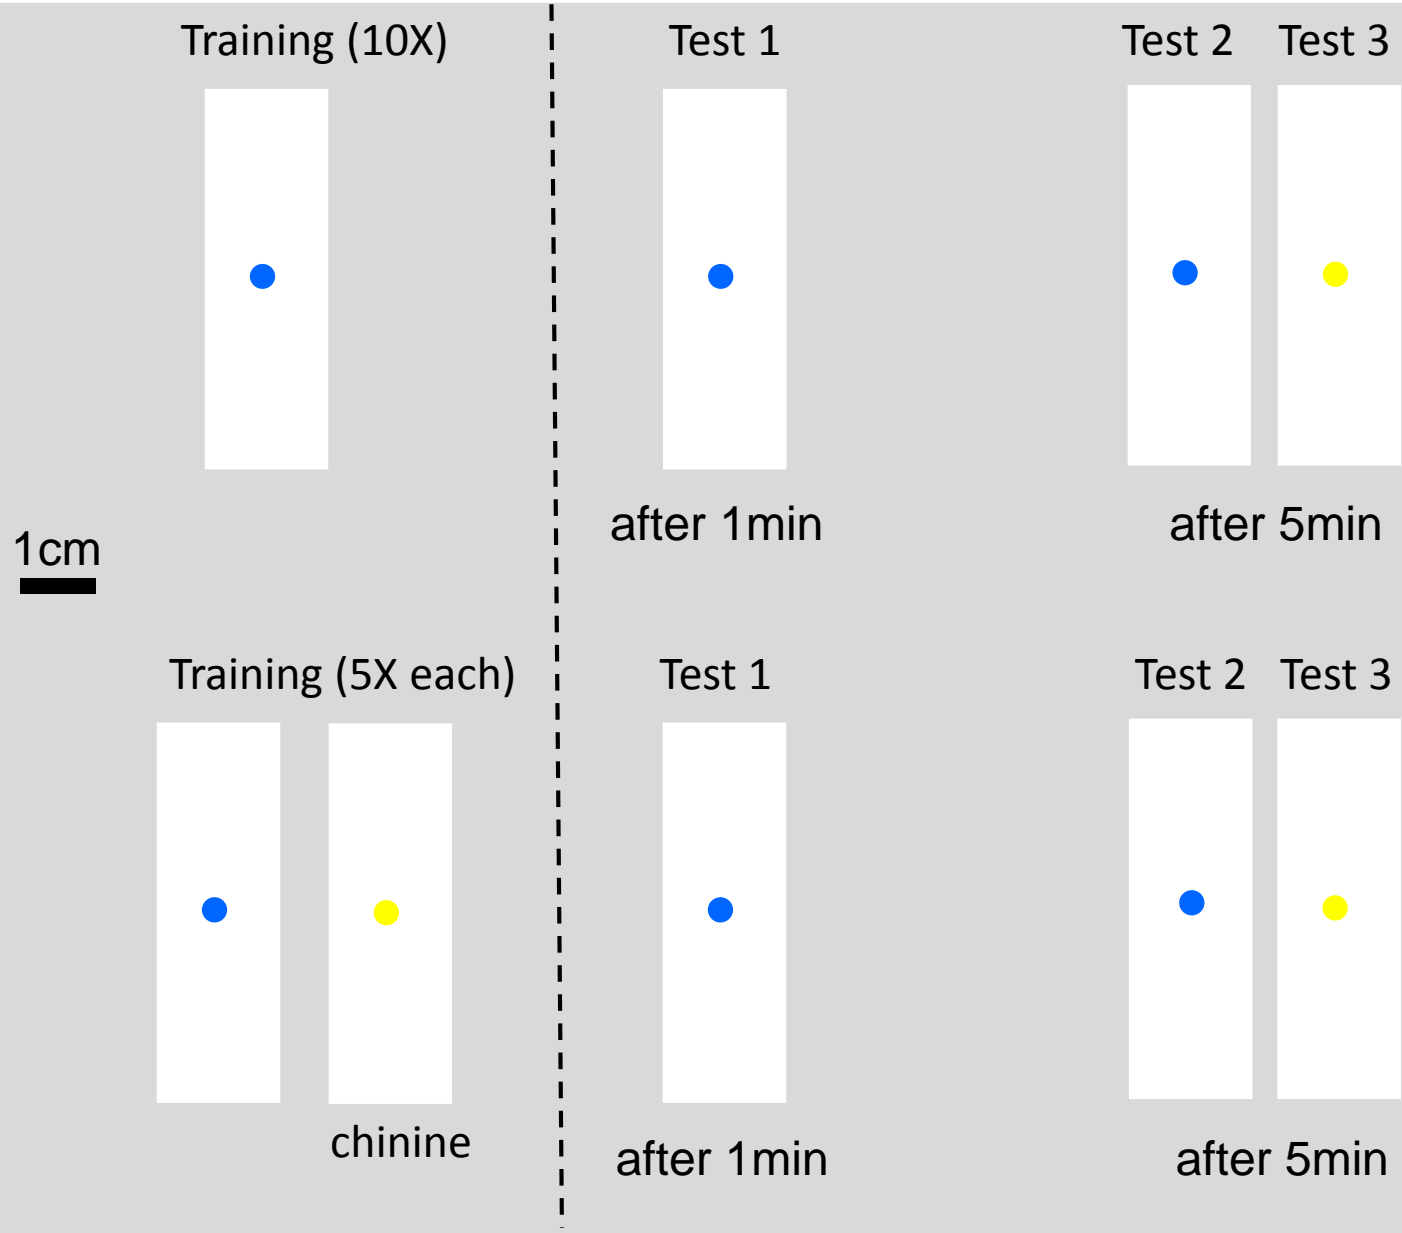

# Proboscis extension reflex in experienced field-caught flies

1cm

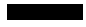

Test

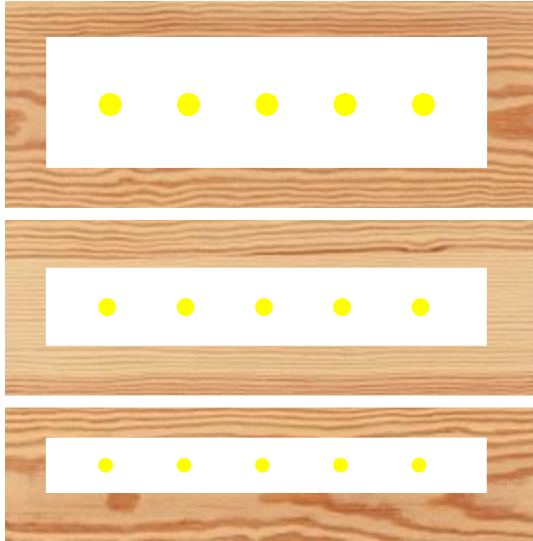

or

or



# Landing response to artificial flowers with different spot colour of small spots

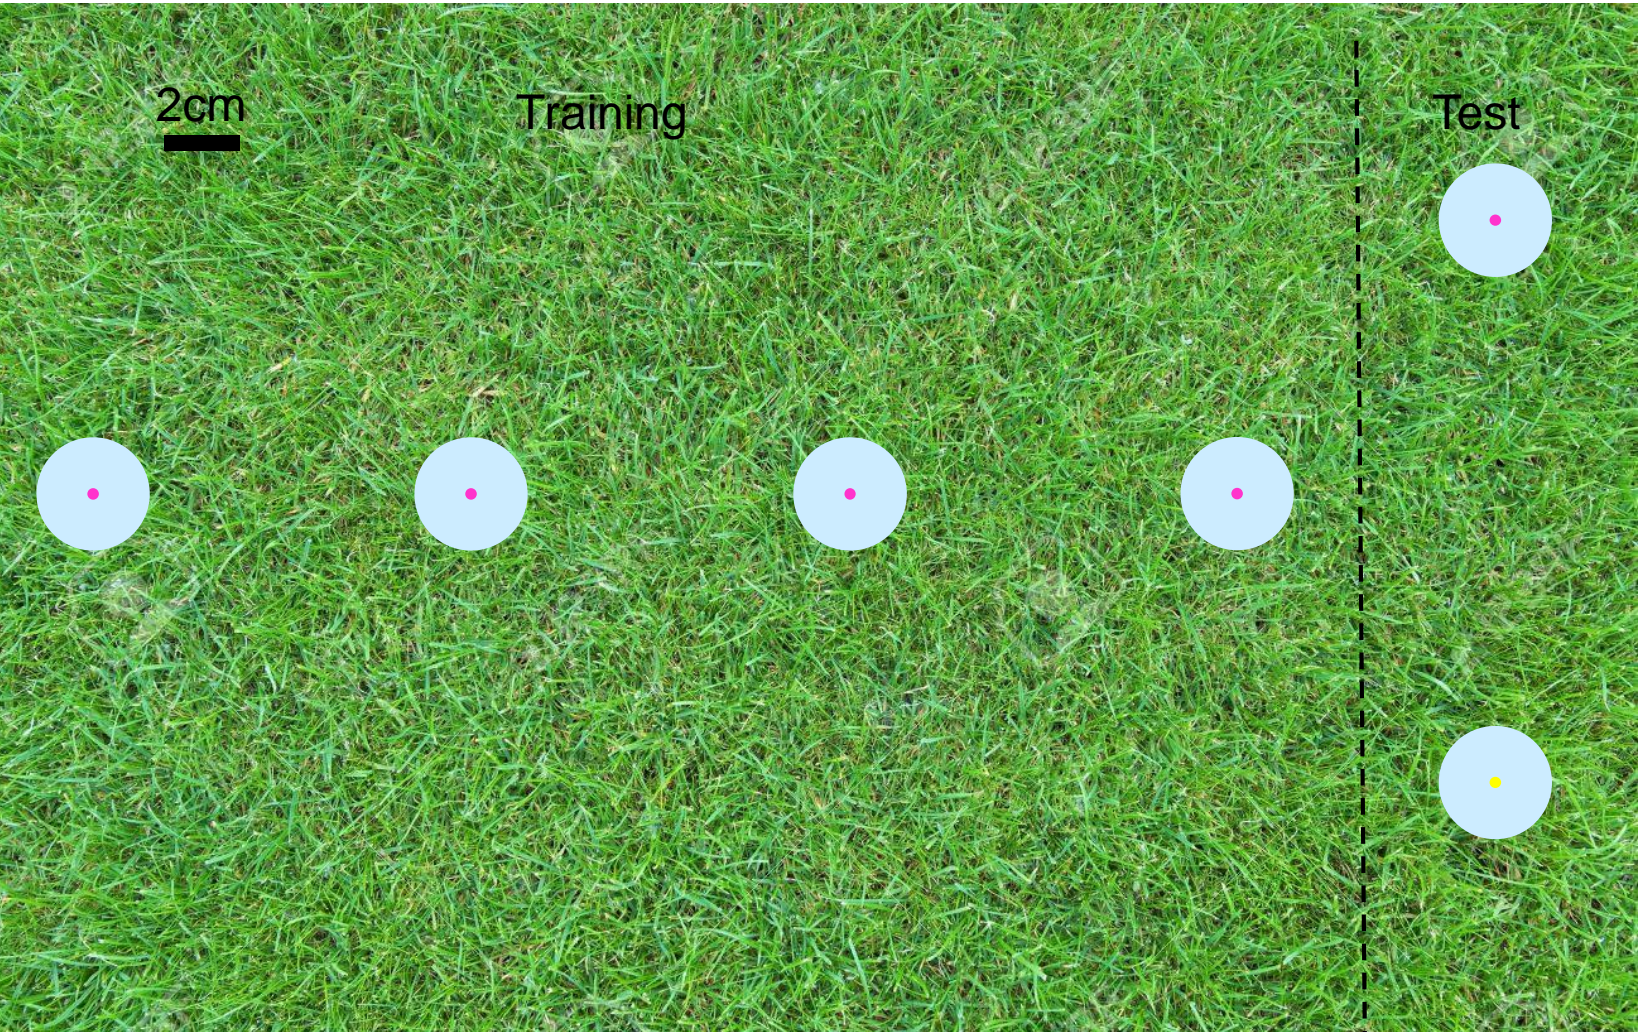

# Landing response to artificial flowers with different spot colour of large spots

Training

2cm

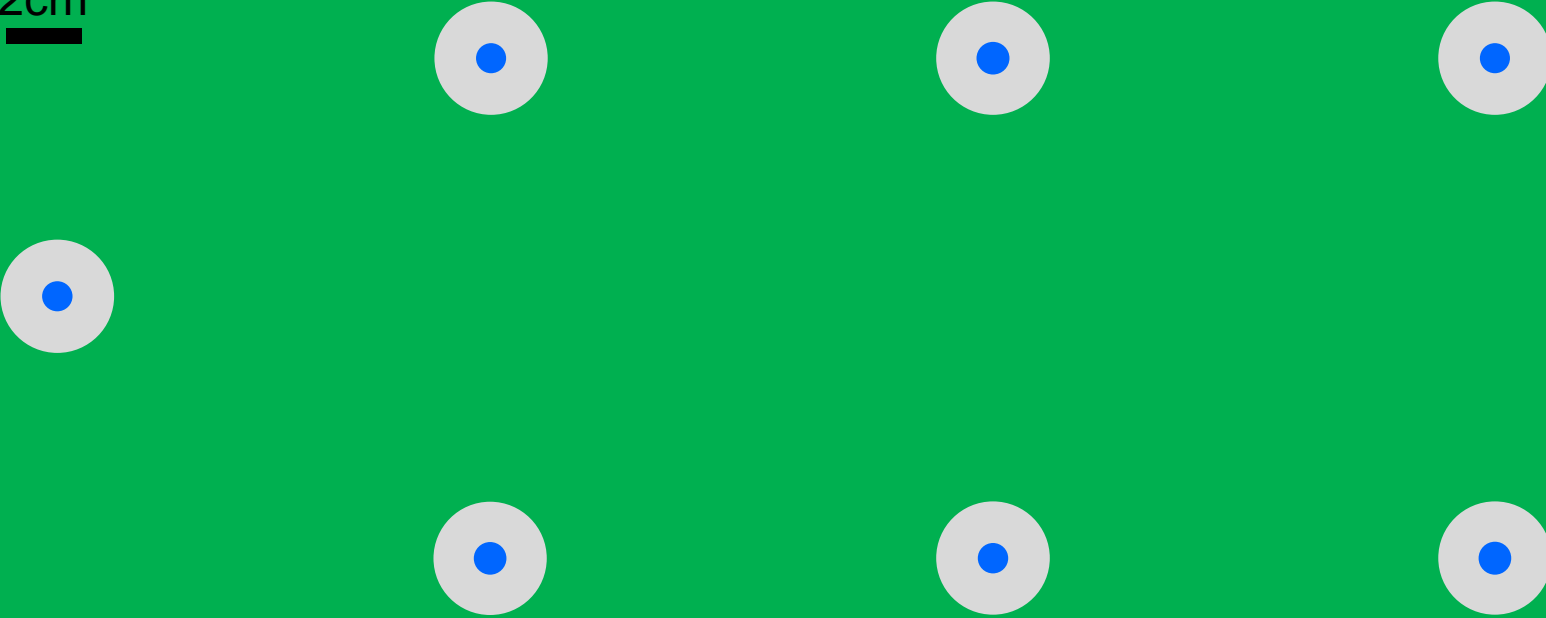

# Landing response to artificial flowers with different spot colour of large spots

Start

2cm

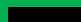

Test

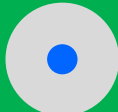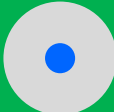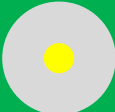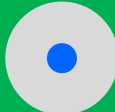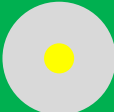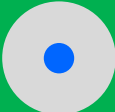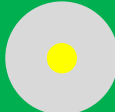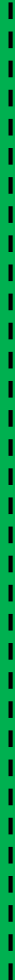

Supplement: pone.0194167.s001.pdf [file pone.0194167.s001.pdf]
